# Supplementary material
Source: PubMed Central journal article supplement (PMC3029937)
Supplement: supp_182_12_1516__1.pdf [file supp_182_12_1516__1.pdf]

## Online Data Supplement

### **Urokinase-Type Plasminogen Activator Inhibits Efferocytosis of Neutrophils**

Yanping Yang<sup>1,#</sup>, Arnaud Friggeri<sup>1,2,#</sup>, Sami Banerjee<sup>1</sup>, Khalil Bdeir<sup>3</sup>, Douglas B. Cines<sup>3</sup>, Gang Liu<sup>1,\*</sup>, Edward Abraham<sup>1,\*</sup>

## **Methods**

**Purification and culture of mouse bone marrow neutrophils.** Purification and culture of mouse bone marrow neutrophils was performed as previously described (1-4). Briefly, the femur and tibia of a mouse were flushed with cold RPMI to obtain bone marrow cells that were resuspended in cold RPMI medium. The cells were then passed through a 0.45  $\mu\text{m}$  filter, pelleted, and re-suspended in 900  $\mu\text{l}$  of cold PBS after which 35  $\mu\text{l}$  of custom primary antibody cocktails against the cell-surface markers F4/80, CD4, CD45R, CD5, and TER119 were added and incubated for 15 minutes with rotation at 4°C, followed by addition of 100  $\mu\text{l}$  of anti-biotin tetrameric antibody complexes and incubation for 15 minutes at 4°C. Finally, 60  $\mu\text{l}$  of colloidal magnetic dextran iron particles were added to the suspension and incubated for another 15 minutes at 4°C with rotation. The entire cell suspension was then loaded into a column, surrounded by a magnet. The T cells, B cells, RBC, monocytes, and macrophages were captured in the column, allowing the neutrophils to pass through by negative selection. The isolated neutrophil population was consistently more than 98% pure, as determined by both flow cytometry analysis (CD11b+GR-1+) and Wright-Giemsa staining following cytopsin and was kept in RPMI medium with 1% FBS.

**Purification and culture of peritoneal macrophages (PM $\Phi$ ).** Peritoneal macrophages (PM $\Phi$ ) were obtained from peritoneal exudates collected 4 days after intraperitoneal injection of 1 ml of sterile 4% thioglycollate. The cells in the peritoneal exudates were washed 3 times and plated in 24 well plates with microscope cover slips (Fisherbrand,

12-545-82 12CIR-1D) at  $0.3 \times 10^6$  cells per well. After incubation at  $37^\circ\text{C}$  for 1 h, the wells were washed three times to remove non-adherent cells. The remaining PM $\Phi$  were cultured in RPMI with 5% inactivated FBS and were used for phagocytosis assays within 4 days of isolation. More than 94% of PM $\Phi$  were Mac-1 positive, as determined by flow cytometry (data not shown).

**Induction of neutrophil apoptosis.** Neutrophils ( $10 \times 10^6$  cells/ml) were suspended in RPMI medium with 1% FBS. When comparing the effect of uPA on the phagocytosis of wild-type or Vn $^{-/-}$  neutrophils, Vn $^{-/-}$  neutrophils were re-suspended in Vn $^{-/-}$  mouse serum and control WT neutrophils in WT mouse serum. To induce apoptosis, neutrophils were heated at  $43^\circ\text{C}$  for 1h, followed by culture at  $37^\circ\text{C}$  in 5%  $\text{CO}_2$  for 2.5 h. This method routinely yielded a population of neutrophils that included approximately 40% cells that were annexin V positive (early apoptotic) and less than 10% of cells that were propidium iodide (PI) and annexin V positive (late apoptotic).

***In vitro* efferocytosis assay.** *In vitro* efferocytosis assays were performed as previously described (5, 6). Briefly,  $3 \times 10^6$  apoptotic neutrophils suspended in RPMI medium with 1% FBS were added to  $0.3 \times 10^6$  macrophages cultured on coverslips. After culture at  $37^\circ\text{C}$  for 2 h, the cover slips were washed 3 times with ice-cold PBS and stained with HEMA 3. Phagocytosis was evaluated by a blinded observer by counting for 4 times from duplicate experiments. The phagocytosis index was calculated as the percentage of macrophages containing at least one engulfed neutrophil.

***In vitro* phagocytosis of beads.** To determine the phagocytosis of carboxylate modified beads by macrophages, beads (2  $\mu\text{m}$ ) were suspended in 1% FBS RPMI medium at a concentration of  $30 \times 10^6/\text{ml}$ .  $15 \times 10^6$  beads were added to  $0.3 \times 10^6$  macrophages cultured on coverslips and co-incubated with 1  $\mu\text{g}/\text{ml}$  scuPA or HSA at  $37^\circ\text{C}$  for 2 h. The coverslips were washed 3 times with cold PBS, stained with HEMA 3, and the phagocytic index determined.

***In Vivo* efferocytosis Assay.** To determine the effect of scuPA on the phagocytosis of apoptotic neutrophils by alveolar macrophages *in vivo*, mice were anesthetized with isoflurane.  $10 \times 10^6$  apoptotic neutrophils and 2  $\mu\text{g}$  of scuPA or HSA were re-suspended in 50  $\mu\text{l}$  sterile PBS and injected intratracheally. Two hours later, the mice were sacrificed and bronchoalveolar lavage (BAL) performed using 1 ml sterile PBS containing 5 mM EDTA. Two cytospin slides were prepared using 300  $\mu\text{l}$  and 500  $\mu\text{l}$  of the BAL. The slides were fixed, stained with HEMA 3, and phagocytosis index determined.

**uPA activity assay.** Protease activity in uPA and uPA mutants was determined using an activity kit (Millipore) according to the manufacturer's instructions. Briefly, 0.2  $\mu\text{g}$  of uPA samples and a gradient of active uPA standards were added to the 96-well plate. Deionized water was added to bring the total volume to 160  $\mu\text{l}$ . Assay buffer (20  $\mu\text{l}$ ) and chromogenic substrate were then added to each well. The plate was incubated at  $37^\circ\text{C}$  for 15 minutes. The optical density (O.D.) of each sample was measured by reading the plate at a wave length of 405 nm. A standard curve for uPA activity was performed and the

protease activity of each uPA sample calculated as U/ $\mu$ g uPA protein.

**Immunoprecipitation and immunoblotting.** Wild type and mutant uPA was preincubated with soluble  $\alpha_v\beta_3$  at 4°C with rotation for 1 h. Anti- $\alpha_v\beta_3$  antibody (1  $\mu$ g/ml) was then added to each sample and incubated at 4°C overnight with rotation. Protein G-agarose beads were then added to each sample and incubated for 2 h. In designated experiments examining the competition between the binding of uPA and MFG-E8 to  $\alpha_v\beta_3$ , uPA or MFG-E8 were pre-incubated with  $\alpha_v\beta_3$  protein for 30 minutes followed by addition of uPA or MFG-E8 to the protein mixtures for another 30 minutes. Finally,  $\alpha_v\beta_3$  antibody was added into each sample of the protein complexes and immunoprecipitation with anti- $\alpha_v\beta_3$  antibody performed. Immunoprecipitated proteins were resolved by Western blots with anti-uPA antibodies.

**Rac-1 activation assay.** Determination of Rac-1 activation using a commercially available kit was performed according to the manufacturer's instructions. In brief, peritoneal macrophages were preincubated with 1  $\mu$ g/ml scuPA or HSA for 1 hour following which  $10 \times 10^6$  apoptotic mouse thymocytes were added to  $2.5 \times 10^6$  macrophages in a 6 well plate and incubated for 30 minutes. The macrophages were then washed 5 times with cold PBS and lysed with  $Mg^{2+}$  lysis buffer. Cell lysates were cleared by centrifugation and the supernatants incubated with 10  $\mu$ L GST tagged PAK-1 PBD agarose slurry at 4°C for 1 h. The agarose beads were then pelleted by centrifugation and washed 5 times with  $Mg^{2+}$  lysis buffer. Active Rac-1 bound to the GST tagged PAK-1 PBD agarose was eluted with 2 $\times$ SDS loading buffer, resolved by SDS-PAGE, and

detected by anti-Rac-1 antibody. The blots were then stripped and blotted with anti-GST antibody to demonstrate equal pull-downs of GST tagged PAK-1 PBD.

## **Supplementary Figure Legends**

**Supplementary Figure 1.** Human scuPA does not activate macrophages to produce pro-inflammatory cytokines. Macrophages were treated with LPS, HSA, MSA, or scuPA at the indicated concentrations for 6 hours. The levels of TNF- $\alpha$  and IL-6 in the medium were determined by ELISA. Data are representative of two independently performed experiments.

**Supplementary Figure 2.** Macrophages were pre-treated for 1 hour with 100  $\mu$ l BAL fluid obtained 24 hours after intratracheal LPS instillation in wild-type or uPA<sup>-/-</sup> mice. The cells were then washed with PBS five times and apoptotic neutrophils added into the cultures. Phagocytosis assays were then performed. n=4 for wild-type mice and n=3 for uPA<sup>-/-</sup> mice. \*\*\*  $P < 0.001$  compared to wild-type group.

## References

1. Kwak, SH, Wang, XQ, He, Q, Fang, WF, Mitra, S, Bdeir, K, Ploplis, VA, Xu, Z, Idell, S, Cines, D, Abraham, E. Plasminogen activator inhibitor-1 potentiates LPS-induced neutrophil activation through a JNK-mediated pathway. *Thromb Haemost* 2006; 95:829-835.
2. Wang, XQ, Bdeir, K, Yarovoi, S, Cines, DB, Fang, W, Abraham, E. Involvement of the urokinase kringle domain in lipopolysaccharide-induced acute lung injury. *J Immunol* 2006; 177:5550-5557.
3. Liu, G, Wang, J, Park, YJ, Tsuruta, Y, Lorne, EF, Zhao, X, Abraham, E. High mobility group protein-1 inhibits phagocytosis of apoptotic neutrophils through binding to phosphatidylserine. *J Immunol* 2008; 181:4240-4246.
4. Park, JS, Arcaroli, J, Yum, HK, Yang, H, Wang, H, Yang, KY, Choe, KH, Strassheim, D, Pitts, TM, Tracey, KJ, Abraham, E. Activation of gene expression in human neutrophils by high mobility group box 1 protein. *Am J Physiol Cell Physiol* 2003; 284:C870-879.
5. Park, YJ, Liu, G, Lorne, EF, Zhao, X, Wang, J, Tsuruta, Y, Zmijewski, J, Abraham, E. PAI-1 inhibits neutrophil efferocytosis. *Proc Natl Acad Sci U S A* 2008; 105:11784-11789.
6. Park, YJ, Liu, G, Tsuruta, Y, Lorne, E, Abraham, E. Participation of the urokinase receptor in neutrophil efferocytosis. *Blood* 2009; 114:860-870.
